# Supplementary material for: Validation of a German Version of Kelley’s (1992) Followership Questionnaire
Source: Atypon-hosted journal article supplement (doi:10.1027/2698-1866/a000005), 2021-01-19
Supplement: 2698-1866_a000005_esm2.pdf [file 2698-1866_a000005_esm2.pdf]

## Validation of a German Version of Kelley's (1992) Followership Questionnaire.

### ESM 2. German items and translation process.

We conducted three steps for the translation process as recommended by Bracken and Barona (1991). First, we translated the English version of the questionnaire into German. Second, an organizational psychology expert without prior knowledge of the questionnaire translated our German version back into its original language (English). Third, we asked two native English speakers and experts in industrial-organizational psychology to compare the back-translation with the original. Both reviewers agreed on the equivalence of the two versions in terms of their meaning, wording, word complexity, format, comprehensibility, and comparability of their concepts:

|                                                                                                                                                                                                                              |
|------------------------------------------------------------------------------------------------------------------------------------------------------------------------------------------------------------------------------|
| Hilft Ihnen Ihre Arbeit dabei, ein für Sie wichtiges gesellschaftliches Ziel oder einen für sie wichtigen persönlichen Traum zu verwirklichen?                                                                               |
| Stehen Ihre persönlichen Arbeitsziele im Einklang mit den vorrangigen Zielen Ihrer Organisation?                                                                                                                             |
| Fühlen Sie sich in hohem Maße Ihrer Arbeit und Ihrer Organisation verpflichtet und durch sie angetrieben, so dass Sie ihnen Ihre besten Ideen und Arbeitsleistungen widmen?                                                  |
| Springt Ihr Enthusiasmus auch auf Ihre Kolleginnen und Kollegen über und gibt ihnen Antrieb?                                                                                                                                 |
| Bestimmen Sie selbst, welche betrieblichen Aktivitäten zum Erreichen der vorrangigen Ziele Ihrer Organisation entscheidend sind, anstatt darauf zu warten oder bloß zu akzeptieren, was Ihnen Ihre Führungskraft sagt?       |
| Entwickeln Sie aktiv eine unverwechselbare Kompetenz für diese entscheidenden Aktivitäten, damit Sie für Ihre Führungskraft und Ihre Organisation wertvoller werden?                                                         |
| Wenn Sie in einem neuen Job oder Aufgabengebiet anfangen, bemühen Sie sich umgehend um einen Nachweis von Erfolgen bei den Aufgaben, die Ihrer Führungskraft wichtig sind?                                                   |
| Kann Ihnen Ihre Führungskraft eine schwierige Aufgabe ohne viel Anleitung übertragen, in dem Wissen, dass Sie Ihre Arbeit mit höchster Qualität fristgerecht abliefern und auftretende Schwierigkeiten meistern, wenn nötig? |
| Ergreifen Sie die Initiative, Aufgaben ausfindig zu machen und erfolgreich zu erledigen, die weit über Ihre Arbeitsplatzbeschreibung hinausgehen?                                                                            |
| Wenn Sie nicht der Leiter/die Leiterin eines Gruppenprojektes sind, leisten Sie trotzdem Ihren Beitrag auf hohem Niveau und tun oft mehr als Ihren Anteil?                                                                   |
| Entwickeln Sie und setzen Sie sich eigenständig für neue Ideen ein, die wesentlich zu den Zielen Ihrer Führungskraft oder Ihrer Organisation beitragen?                                                                      |
| Versuchen Sie wirklich schwierige Probleme (fachlich oder organisatorisch) selbst zu lösen, anstatt darauf zu setzen, dass das Ihre Führungskraft für Sie erledigt?                                                          |
| Helfen Sie anderen Kolleginnen und Kollegen, sodass diese gut dastehen, selbst wenn Sie dafür nicht selbst belohnt werden?                                                                                                   |
| Spielen Sie wenn nötig des Teufels Anwalt, um Ihrer Führungskraft oder Ihrer Gruppe sowohl die Vorteile als auch die Risiken von Ideen oder Plänen aufzuzeigen?                                                              |

|                                                                                                                                                                   |
|-------------------------------------------------------------------------------------------------------------------------------------------------------------------|
| Verstehen Sie die Bedürfnisse, Ziele und Handlungszwänge Ihrer Führungskraft und arbeiten hart, um bei deren Erfüllung zu helfen?                                 |
| Geben Sie entschlossen und ehrlich Ihre Stärken und Schwächen zu, anstatt eine Beurteilung auf die lange Bank zu schieben?                                        |
| Machen Sie es sich zur Gewohnheit, die Klugheit der Entscheidung Ihrer Führungskraft für sich zu hinterfragen, anstatt einfach das zu tun, was Ihnen gesagt wird? |
| Wenn Ihre Führungskraft Sie bittet, etwas zu tun, das Ihren beruflichen oder persönlichen Präferenzen widerspricht, sagen Sie eher „nein“ als „ja“?               |
| Verhalten Sie sich eher gemäß Ihren eigenen ethischen Standards als entsprechend den Standards der Führungskraft oder der Gruppe?                                 |
| Setzen Sie Ihre Meinung bei wichtigen Themen durch, auch wenn dies vielleicht einen Konflikt mit Ihrer Gruppe oder Repressalien von Ihrer Führungskraft bedeutet? |

The final German questionnaire contains the following items:

|                                                                                                                                                                                                                              |
|------------------------------------------------------------------------------------------------------------------------------------------------------------------------------------------------------------------------------|
| <b>Active Engagement (AE):</b>                                                                                                                                                                                               |
| Bestimmen Sie selbst, welche betrieblichen Aktivitäten zum Erreichen der vorrangigen Ziele Ihrer Organisation entscheidend sind, anstatt darauf zu warten oder bloß zu akzeptieren, was Ihnen Ihre Führungskraft sagt?       |
| Entwickeln Sie aktiv eine unverwechselbare Kompetenz für diese entscheidenden Aktivitäten, damit Sie für Ihre Führungskraft und Ihre Organisation wertvoller werden?                                                         |
| Wenn Sie in einem neuen Job oder Aufgabengebiet anfangen, bemühen Sie sich umgehend um einen Nachweis von Erfolgen bei den Aufgaben, die Ihrer Führungskraft wichtig sind?                                                   |
| Kann Ihnen Ihre Führungskraft eine schwierige Aufgabe ohne viel Anleitung übertragen, in dem Wissen, dass Sie Ihre Arbeit mit höchster Qualität fristgerecht abliefern und auftretende Schwierigkeiten meistern, wenn nötig? |
| Ergreifen Sie die Initiative, Aufgaben ausfindig zu machen und erfolgreich zu erledigen, die weit über Ihre Arbeitsplatzbeschreibung hinausgehen?                                                                            |
| Wenn Sie nicht der Leiter/die Leiterin eines Gruppenprojektes sind, leisten Sie trotzdem Ihren Beitrag auf hohem Niveau und tun oft mehr als Ihren Anteil?                                                                   |
| Entwickeln Sie und setzen Sie sich eigenständig für neue Ideen ein, die wesentlich zu den Zielen Ihrer Führungskraft oder Ihrer Organisation beitragen?                                                                      |
| Versuchen Sie wirklich schwierige Probleme (fachlich oder organisatorisch) selbst zu lösen, anstatt darauf zu setzen, dass das Ihre Führungskraft für Sie erledigt?                                                          |
| Verstehen Sie die Bedürfnisse, Ziele und Handlungszwänge Ihrer Führungskraft und arbeiten hart, um bei deren Erfüllung zu helfen?                                                                                            |
| Geben Sie entschlossen und ehrlich Ihre Stärken und Schwächen zu, anstatt eine Beurteilung auf die lange Bank zu schieben?                                                                                                   |
| <b>Independent, Critical Thinking (ICT):</b>                                                                                                                                                                                 |
| Machen Sie es sich zur Gewohnheit, die Klugheit der Entscheidung Ihrer Führungskraft für sich zu hinterfragen, anstatt einfach das zu tun, was Ihnen gesagt wird?                                                            |
| Wenn Ihre Führungskraft Sie bittet, etwas zu tun, das Ihren beruflichen oder persönlichen Präferenzen widerspricht, sagen Sie eher „nein“ als „ja“?                                                                          |

Verhalten Sie sich eher gemäß Ihren eigenen ethischen Standards als entsprechend den Standards der Führungskraft oder der Gruppe?

Setzen Sie Ihre Meinung bei wichtigen Themen durch, auch wenn dies vielleicht einen Konflikt mit Ihrer Gruppe oder Repressalien von Ihrer Führungskraft bedeutet?

**Reference:**

Bracken, B. A., & Barona, A. (1991). State of the art procedures for translating, validating and using psychoeducational tests in cross-cultural assessment. *School Psychology International*, 12(1-2), 119–132. <https://doi.org/10.1177/0143034391121010>
