# Supplementary material for: Validation of a German Version of Kelley’s (1992) Followership Questionnaire
Source: Atypon-hosted journal article supplement (doi:10.1027/2698-1866/a000005), 2021-01-19
Supplement: 2698-1866_a000005_esm3.pdf [file 2698-1866_a000005_esm3.pdf]

## Validation of a German Version of Kelley's (1992) Followership Questionnaire.

### ESM 3. Followership item and scale analysis.

#### *Followership item analysis for the first subsample of Study 1*

| Item                                          | <i>M</i> | <i>SD</i> | <i>Difficulty</i> | <i>Corrected Item-Total Correlations</i> |
|-----------------------------------------------|----------|-----------|-------------------|------------------------------------------|
| Personally identify (AE)                      | 4.73     | 1.59      | 53.35             | .58                                      |
| Actively develop (AE)                         | 5.22     | 1.40      | 60.24             | .70                                      |
| Build success (AE)                            | 4.80     | 1.43      | 54.30             | .46                                      |
| Highest quality work (AE)                     | 5.96     | 0.91      | 70.92             | .59                                      |
| Take initiative (AE)                          | 4.84     | 0.42      | 54.87             | .65                                      |
| Contribute high level (AE)                    | 5.48     | 1.20      | 64.03             | .68                                      |
| Think up new ideas (AE)                       | 4.96     | 1.33      | 56.57             | .74                                      |
| Solve tough problems (AE)                     | 5.58     | 1.16      | 65.49             | .60                                      |
| Help coworkers (AE)                           | 5.70     | 1.06      | 67.13             | .44                                      |
| See opportunities and risks (AE)              | 4.73     | 1.45      | 53.35             | .49                                      |
| Understanding the needs and objectives (AE)   | 4.85     | 1.25      | 55.06             | .58                                      |
| Recognize one's strengths and weaknesses (AE) | 5.45     | 1.16      | 63.53             | .56                                      |
| Question decisions (ICT)                      | 5.41     | 1.29      | 62.96             | .50                                      |
| Contrary (ICT)                                | 4.55     | 1.51      | 50.76             | .52                                      |
| Ethical standards (ICT)                       | 5.26     | 1.25      | 60.87             | .54                                      |
| Assert issues (ICT)                           | 4.44     | 1.35      | 49.12             | .55                                      |

*Notes.*  $n = 226$ .  $M$  = Mean.  $SD$  = Standard Deviation. Dimension classification is presented in brackets.

Study 1, first subsample: *AE* scale mean is  $M = 5.19$  with  $SD = 0.90$ . *ICT* scale mean is  $M = 4.92$  with  $SD = 1.01$ . Correlations with gender are for *AE*  $r = .08$ ,  $p = .23$ , and for *ICT*  $r = -.05$ ,  $p = .51$ . Correlations with age are for *AE*  $r = .07$ ,  $p = .30$ , and for *ICT*  $r = .27$ ,  $p = .00$ .

*Followership item analysis for the second subsample of Study 1*

| Item                                          | <i>M</i> | <i>SD</i> | <i>Difficulty</i> | <i>Corrected Item-Total Correlations</i> |
|-----------------------------------------------|----------|-----------|-------------------|------------------------------------------|
| Personally identify (AE)                      | 4.84     | 1.52      | 54.86             | .52                                      |
| Actively develop (AE)                         | 5.17     | 1.34      | 59.62             | .70                                      |
| Build success (AE)                            | 4.86     | 1.35      | 55.17             | .44                                      |
| Highest quality work (AE)                     | 5.92     | 0.99      | 70.35             | .60                                      |
| Take initiative (AE)                          | 4.92     | 1.50      | 56.06             | .62                                      |
| Contribute high level (AE)                    | 5.38     | 1.20      | 62.54             | .62                                      |
| Think up new ideas (AE)                       | 4.97     | 1.26      | 56.76             | .71                                      |
| Solve tough problems (AE)                     | 5.59     | 1.19      | 65.52             | .62                                      |
| Help coworkers (AE)                           | 5.63     | 1.14      | 66.10             | .49                                      |
| See opportunities and risks (AE)              | 4.81     | 1.61      | 54.41             | .55                                      |
| Understanding the needs and objectives (AE)   | 4.78     | 1.30      | 53.97             | .54                                      |
| Recognize one's strengths and weaknesses (AE) | 5.45     | 1.19      | 63.62             | .62                                      |
| Question decisions (ICT)                      | 5.18     | 1.35      | 59.68             | .42                                      |
| Contrary (ICT)                                | 4.49     | 1.52      | 49.84             | .46                                      |
| Ethical standards (ICT)                       | 5.00     | 1.43      | 57.08             | .62                                      |
| Assert issues (ICT)                           | 4.47     | 1.53      | 49.52             | .60                                      |

*Notes.*  $n = 225$ . *M* = Mean. *SD* = Standard Deviation. Dimension classification is presented in brackets.

Study 1, second subsample: *AE* scale mean is  $M = 5.19$  with  $SD = 0.88$ . *ICT* scale mean is  $M = 4.78$  with  $SD = 1.09$ . Correlations with gender are for *AE*  $r = .04$ ,  $p = .60$ , and for *ICT*  $r = -.05$ ,  $p = .45$ . Correlations with age are for *AE*  $r = .11$ ,  $p = .09$ , and for *ICT*  $r = .17$ ,  $p = .01$ .
