# Supplementary material for: Validation of a German Version of Kelley’s (1992) Followership Questionnaire
Source: Atypon-hosted journal article supplement (doi:10.1027/2698-1866/a000005), 2021-01-19
Supplement: 2698-1866_a000005_esm4.pdf [file 2698-1866_a000005_esm4.pdf]

## Validation of a German Version of Kelley's (1992) Followership Questionnaire.

### ESM 4. CFA results, Study 1.

#### *Results of Confirmatory Factor Analysis, Subsample 2*

| Item                                     | Factor | STD estimate | S.E. | Two-tailed p-value |
|------------------------------------------|--------|--------------|------|--------------------|
| Actively develop                         | AE     | .81          | .03  | .00                |
| Think up new ideas                       | AE     | .78          | .03  | .00                |
| Take initiative                          | AE     | .71          | .03  | .00                |
| Highest quality work                     | AE     | .70          | .04  | .00                |
| Contribute high level                    | AE     | .68          | .04  | .00                |
| Solve tough problems                     | AE     | .67          | .04  | .00                |
| Recognize one's strengths and weaknesses | AE     | .67          | .04  | .00                |
| Personally identify                      | AE     | .63          | .04  | .00                |
| Understanding the needs and objectives   | AE     | .54          | .05  | .00                |
| Build success                            | AE     | .50          | .04  | .00                |
| Assert issues                            | ICT    | .79          | .04  | .00                |
| Ethical standards                        | ICT    | .68          | .05  | .00                |
| Question decisions                       | ICT    | .67          | .05  | .00                |
| Contrary                                 | ICT    | .53          | .05  | .00                |

*Note.*  $n = 225$ . STD estimate = Standardized estimate. S.E. = Standard error.
