# Supplementary material for: Validation of a German Version of Kelley’s (1992) Followership Questionnaire
Source: Atypon-hosted journal article supplement (doi:10.1027/2698-1866/a000005), 2021-01-19
Supplement: 2698-1866_a000005_esm5.pdf [file 2698-1866_a000005_esm5.pdf]

## Validation of a German Version of Kelley's (1992) Followership Questionnaire.

### ESM 5. Local misspecification detection.

Potential local misspecifications of the followership model were detected based on Mplus modification indices (MI), expected parameter change (EPC) and a power test for MI, as proposed by Saris et al., 2009. The test was computed with the software Jrule (Oberski, 2010).

#### Decision rules:

| Minimum misspecification | Alpha | "High" power |
|--------------------------|-------|--------------|
| 0.2                      | 0.05  | 0.8          |

#### Results for Study 1:

| Parameter        | Jrule Decision for potential misspecification | MI     | EPC    | Power | NCP    |
|------------------|-----------------------------------------------|--------|--------|-------|--------|
| FL_ICT BY FL_11  | Misspecified                                  | 16.477 | 0.432  | 0.468 | 3.532  |
| FL_AE BY FL_19   | Misspecified                                  | 10.904 | -0.436 | 0.328 | 2.294  |
| FL_AE BY FL_17   | Misspecified                                  | 17.219 | 0.535  | 0.342 | 2.406  |
| FL_16 WITH FL_15 | Misspecified (EPC $\geq$ delta)               | 67.320 | 0.334  | 0.998 | 24.139 |
| FL_06 WITH FL_05 | Misspecified (EPC $\geq$ delta)               | 34.177 | 0.216  | 1.000 | 29.301 |
| FL_06 ON FL_05   | Misspecified (EPC $\geq$ delta)               | 34.177 | 0.216  | 1.000 | 29.301 |
| FL_18 ON FL_19   | Misspecified (EPC $\geq$ delta)               | 25.100 | 0.247  | 0.982 | 16.457 |
| FL_19 ON FL_18   | Misspecified (EPC $\geq$ delta)               | 25.100 | 0.247  | 0.982 | 16.457 |
| FL_19 WITH FL_18 | Misspecified (EPC $\geq$ delta)               | 25.100 | 0.247  | 0.982 | 16.457 |
| FL_15 ON FL_16   | Misspecified (EPC $\geq$ delta)               | 67.323 | 0.334  | 0.998 | 24.140 |
| FL_05 ON FL_06   | Misspecified (EPC $\geq$ delta)               | 34.178 | 0.216  | 1.000 | 29.302 |
| FL_16 ON FL_15   | Misspecified (EPC $\geq$ delta)               | 67.319 | 0.334  | 0.998 | 24.138 |
| FL_ICT ON FL_17  | Not misspecified (EPC $<$ delta)              | 17.218 | -0.185 | 0.994 | 20.123 |
| FL_17 WITH FL_AE | Not misspecified (EPC $<$ delta)              | 17.219 | 0.117  | 1.000 | 50.315 |
| FL_ICT ON FL_11  | Not misspecified (EPC $<$ delta)              | 16.479 | 0.107  | 1.000 | 57.574 |

| <b>Parameter</b>  | <b>Jrule Decision for potential misspecification</b> | <b>MI</b> | <b>EPC</b> | <b>Power</b> | <b>NCP</b> |
|-------------------|------------------------------------------------------|-----------|------------|--------------|------------|
| FL_AE ON FL_19    | Not misspecified (EPC < delta)                       | 10.905    | -0.095     | 1.000        | 48.332     |
| FL_AE ON FL_17    | Not misspecified (EPC < delta)                       | 17.220    | 0.117      | 1.000        | 50.318     |
| FL_ICT ON FL_19   | Not misspecified (EPC < delta)                       | 10.907    | 0.151      | 0.992        | 19.134     |
| FL_AE ON FL_11    | Not misspecified (EPC < delta)                       | 16.478    | -0.149     | 1.000        | 29.689     |
| FL_17 ON FL_16    | Not misspecified (EPC < delta)                       | 10.059    | 0.134      | 0.997        | 22.408     |
| FL_17 ON FL_12    | Not misspecified (EPC < delta)                       | 14.118    | 0.177      | 0.989        | 18.025     |
| FL_11 WITH FL_AE  | Not misspecified (EPC < delta)                       | 16.479    | -0.149     | 1.000        | 29.691     |
| FL_19 WITH FL_ICT | Not misspecified (EPC < delta)                       | 10.906    | 0.150      | 0.993        | 19.388     |
| FL_10 ON FL_08    | Not misspecified (EPC < delta)                       | 10.819    | 0.142      | 0.996        | 21.462     |
| FL_10 WITH FL_08  | Not misspecified (EPC < delta)                       | 10.818    | 0.142      | 0.996        | 21.460     |
| FL_11 ON FL_20    | Not misspecified (EPC < delta)                       | 11.002    | 0.106      | 1.000        | 39.167     |
| FL_11 WITH FL_ICT | Not misspecified (EPC < delta)                       | 16.478    | 0.107      | 1.000        | 57.570     |
| FL_19 WITH FL_AE  | Not misspecified (EPC < delta)                       | 10.905    | -0.095     | 1.000        | 48.332     |
| FL_17 WITH FL_ICT | Not misspecified (EPC < delta)                       | 17.219    | -0.185     | 0.994        | 20.124     |
| FL_08 ON FL_10    | Not misspecified (EPC < delta)                       | 10.819    | 0.142      | 0.996        | 21.462     |

## Results for Study 2:

| <b>Parameter</b> | <b>Jrule Decision for potential misspecification</b> | <b>MI</b> | <b>EPC</b> | <b>Power</b> | <b>NCP</b> |
|------------------|------------------------------------------------------|-----------|------------|--------------|------------|
| FL_ICT BY FL_16  | Misspecified                                         | 55.454    | 0.647      | 0.634        | 5.299      |
| FL_ICT BY FL_07  | Misspecified                                         | 12.009    | -0.326     | 0.566        | 4.520      |
| FL_ICT BY FL_15  | Misspecified                                         | 63.725    | -0.773     | 0.542        | 4.266      |
| FL_06 ON FL_05   | Misspecified (EPC $\geq$ delta)                      | 48.949    | 0.222      | 1.000        | 39.728     |
| FL_15 ON FL_18   | Misspecified (EPC $\geq$ delta)                      | 43.381    | -0.277     | 0.997        | 22.615     |
| FL_15 WITH FL_AE | Misspecified (EPC $\geq$ delta)                      | 63.725    | 0.361      | 0.993        | 19.559     |
| FL_06 WITH FL_05 | Misspecified (EPC $\geq$ delta)                      | 48.949    | 0.222      | 1.000        | 39.728     |
| FL_15 ON FL_17   | Misspecified (EPC $\geq$ delta)                      | 38.620    | -0.207     | 1.000        | 36.052     |

| <b>Parameter</b>  | <b>Jrule Decision for potential misspecification</b> | <b>MI</b> | <b>EPC</b> | <b>Power</b> | <b>NCP</b> |
|-------------------|------------------------------------------------------|-----------|------------|--------------|------------|
| FL_18 ON FL_15    | Misspecified (EPC $\geq$ delta)                      | 33.016    | -0.244     | 0.997        | 22.182     |
| FL_18 WITH FL_15  | Misspecified (EPC $\geq$ delta)                      | 27.839    | -0.240     | 0.993        | 19.333     |
| FL_15 WITH FL_1CT | Misspecified (EPC $\geq$ delta)                      | 63.725    | -0.207     | 1.000        | 59.488     |
| FL_20 WITH FL_17  | Misspecified (EPC $\geq$ delta)                      | 16.153    | -0.210     | 0.969        | 14.651     |
| FL_05 ON FL_06    | Misspecified (EPC $\geq$ delta)                      | 48.949    | 0.222      | 1.000        | 39.728     |
| FL_17 ON FL_20    | Misspecified (EPC $\geq$ delta)                      | 16.153    | -0.210     | 0.969        | 14.651     |
| FL_12 ON FL_08    | Misspecified (EPC $\geq$ delta)                      | 37.173    | 0.215      | 1.000        | 32.167     |
| FL_08 ON FL_12    | Misspecified (EPC $\geq$ delta)                      | 37.173    | 0.215      | 1.000        | 32.167     |
| FL_15 ON FL_20    | Misspecified (EPC $\geq$ delta)                      | 38.967    | -0.210     | 1.000        | 35.344     |
| FL_1CT ON FL_15   | Misspecified (EPC $\geq$ delta)                      | 63.725    | -0.207     | 1.000        | 59.488     |
| FL_AE ON FL_16    | Misspecified (EPC $\geq$ delta)                      | 55.453    | -0.302     | 0.999        | 24.320     |
| FL_16 WITH FL_AE  | Misspecified (EPC $\geq$ delta)                      | 55.453    | -0.302     | 0.999        | 24.320     |
| FL_20 ON FL_17    | Misspecified (EPC $\geq$ delta)                      | 16.153    | -0.210     | 0.969        | 14.651     |
| FL_12 WITH FL_08  | Misspecified (EPC $\geq$ delta)                      | 37.173    | 0.215      | 1.000        | 32.167     |
| FL_AE ON FL_15    | Misspecified (EPC $\geq$ delta)                      | 63.725    | 0.361      | 0.993        | 19.559     |
| FL_17 WITH FL_15  | Not misspecified (EPC $<$ delta)                     | 20.256    | -0.195     | 0.996        | 21.308     |
| FL_10 WITH FL_09  | Not misspecified (EPC $<$ delta)                     | 14.590    | 0.135      | 1.000        | 32.022     |
| FL_20 WITH FL_11  | Not misspecified (EPC $<$ delta)                     | 11.387    | 0.127      | 1.000        | 28.240     |
| FL_07 ON FL_20    | Not misspecified (EPC $<$ delta)                     | 10.902    | -0.106     | 1.000        | 38.811     |
| FL_1CT ON FL_07   | Not misspecified (EPC $<$ delta)                     | 12.010    | -0.087     | 1.000        | 63.469     |
| FL_20 ON FL_15    | Not misspecified (EPC $<$ delta)                     | 15.650    | -0.174     | 0.995        | 20.676     |
| FL_11 ON FL_20    | Not misspecified (EPC $<$ delta)                     | 10.663    | 0.094      | 1.000        | 48.271     |
| FL_16 ON FL_17    | Not misspecified (EPC $<$ delta)                     | 37.243    | 0.179      | 1.000        | 46.494     |
| FL_AE ON FL_07    | Not misspecified (EPC $<$ delta)                     | 12.011    | 0.152      | 0.995        | 20.795     |

| <b>Parameter</b>  | <b>Jrule Decision for potential misspecification</b> | <b>MI</b> | <b>EPC</b> | <b>Power</b> | <b>NCP</b> |
|-------------------|------------------------------------------------------|-----------|------------|--------------|------------|
| FL_07 WITH FL_AE  | Not misspecified (EPC < delta)                       | 12.011    | 0.152      | 0.995        | 20.795     |
| FL_16 ON FL_19    | Not misspecified (EPC < delta)                       | 39.361    | 0.187      | 1.000        | 45.024     |
| FL_10 ON FL_09    | Not misspecified (EPC < delta)                       | 14.589    | 0.135      | 1.000        | 32.020     |
| FL_17 ON FL_15    | Not misspecified (EPC < delta)                       | 16.067    | -0.169     | 0.997        | 22.502     |
| FL_15 WITH FL_11  | Not misspecified (EPC < delta)                       | 14.781    | 0.151      | 0.999        | 25.930     |
| FL_07 WITH FL_ICT | Not misspecified (EPC < delta)                       | 12.010    | -0.087     | 1.000        | 63.469     |
| FL_19 WITH FL_16  | Not misspecified (EPC < delta)                       | 24.168    | 0.178      | 1.000        | 30.511     |
| FL_ICT ON FL_16   | Not misspecified (EPC < delta)                       | 55.454    | 0.174      | 1.000        | 73.265     |
| FL_09 ON FL_10    | Not misspecified (EPC < delta)                       | 14.589    | 0.135      | 1.000        | 32.020     |
| FL_16 WITH FL_ICT | Not misspecified (EPC < delta)                       | 55.454    | 0.174      | 1.000        | 73.265     |
| FL_19 ON FL_16    | Not misspecified (EPC < delta)                       | 15.959    | 0.132      | 1.000        | 36.637     |
| FL_17 ON FL_16    | Not misspecified (EPC < delta)                       | 23.147    | 0.169      | 1.000        | 32.418     |
| FL_20 WITH FL_15  | Not misspecified (EPC < delta)                       | 19.463    | -0.199     | 0.993        | 19.659     |
| FL_11 ON FL_15    | Not misspecified (EPC < delta)                       | 14.781    | 0.151      | 0.999        | 25.930     |
| FL_07 ON FL_19    | Not misspecified (EPC < delta)                       | 11.085    | -0.111     | 1.000        | 35.987     |
| FL_10 ON FL_07    | Not misspecified (EPC < delta)                       | 12.511    | 0.147      | 0.998        | 23.159     |
| FL_07 ON FL_10    | Not misspecified (EPC < delta)                       | 12.512    | 0.147      | 0.998        | 23.161     |
| FL_10 WITH FL_07  | Not misspecified (EPC < delta)                       | 12.511    | 0.147      | 0.998        | 23.159     |
| FL_15 ON FL_11    | Not misspecified (EPC < delta)                       | 14.780    | 0.151      | 0.999        | 25.929     |
| FL_16 ON FL_20    | Not misspecified (EPC < delta)                       | 21.453    | 0.136      | 1.000        | 46.395     |
| FL_15 ON FL_19    | Not misspecified (EPC < delta)                       | 17.001    | -0.141     | 1.000        | 34.206     |
| FL_17 WITH FL_16  | Not misspecified (EPC < delta)                       | 21.280    | 0.174      | 1.000        | 28.115     |
| FL_20 ON FL_11    | Not misspecified (EPC < delta)                       | 13.123    | 0.123      | 1.000        | 34.696     |

**References:**

Oberski, D. L. (2010). *Jrule for Mplus* (Version 0.91) [Computer software].

<http://wiki.github.com/daob/JruleMplus>

Saris, W. E., Satorra, A., & van der Veld, W. M. (2009). Testing structural equation models or detection of misspecifications. *Structural Equation Modeling, 16*, 561-582.

<https://doi.org/10.1080/10705510903203433>
