# Supplementary material for: Validation of a German Version of Kelley’s (1992) Followership Questionnaire
Source: Atypon-hosted journal article supplement (doi:10.1027/2698-1866/a000005), 2021-01-19
Supplement: 2698-1866_a000005_esm6.pdf [file 2698-1866_a000005_esm6.pdf]

## Validation of a German Version of Kelley's (1992) Followership Questionnaire.

### ESM 6. Study 2 instruments.

| Instrument                                                                                                                   | Authors                                                       | Item example                                                                                                                                              | Response scale                                       |
|------------------------------------------------------------------------------------------------------------------------------|---------------------------------------------------------------|-----------------------------------------------------------------------------------------------------------------------------------------------------------|------------------------------------------------------|
| Followership<br>AE                                                                                                           | Kelley<br>(1992)                                              | "Do you understand the leader's needs, goals, and constraints, and work hard to help meet them?"                                                          | (almost) never (1) to (almost) always (7)            |
| ICT                                                                                                                          |                                                               | "Do you assert your views on important issues, even though it might mean conflict with your group or reprisals from the leader?"                          |                                                      |
| Personal Initiative                                                                                                          | Frese et al.<br>(1997)                                        | "I actively attack problems"                                                                                                                              | not correct at all (1) to applies completely (7)     |
| Self-responsibility                                                                                                          | Bierhoff et al. (2005)                                        | "I always try to prepare a decision by reflecting intensively on advantages and disadvantages"                                                            | incorrect (1) to very correct (7)                    |
| Subordinate influence tactics (SITs)<br>Flattering<br>Rational Influence<br>Exerting Pressure<br>Engaging superior authority | Blickle and Gönner<br>(1999)                                  | "I praise my supervisor effusively"<br>"I use rational arguments"<br>"I openly stand against my supervisor"<br>"I officially apply to superior authority" | (almost) never (1) to (almost) always (7)            |
| Leader-member-exchange (LMX)                                                                                                 | Graen and Uhl-Bien<br>(1995),<br>German:<br>Schyns<br>(2002)  | "How would you characterize your working relationship with your leader?"                                                                                  | extremely ineffective (1) to extremely effective (7) |
| Job satisfaction                                                                                                             | Nübling et al., 2005                                          | satisfaction with career perspective, colleagues, leadership, physical working conditions, use of abilities, challenges of work, job satisfaction overall | very dissatisfied (1) to very satisfied (7)          |
| Organizational commitment                                                                                                    | Mowday et al. (1979),<br>German:<br>Maier & Woschée<br>(2002) | "I am proud when I can say that I belong to this company"                                                                                                 | strongly disagree (1) to fully agree (7)             |
| Organizational citizenship behaviors (OCBs)<br>Helpfulness<br>Initiative                                                     | Staufenbiel & Hartz<br>(2000)                                 | "I help others, when they are overworked"<br>"I take the initiative to save the company from potential problems"                                          | not correct at all (1) to applies completely (7)     |

| Instrument                  | Authors                                                    | Item example                                               | Response scale                                                                                                           |
|-----------------------------|------------------------------------------------------------|------------------------------------------------------------|--------------------------------------------------------------------------------------------------------------------------|
| Emotional exhaustion        | Maslach & Jackson (1986), German: Enzmann & Kleiber (1989) | "I feel burned out from my work"                           | Several times a year or rarer, once in a month, several times in a month, once a week, several times in a week, or daily |
| Big Five personality traits | Rammstedt & John (2005)                                    |                                                            | very wrong (1) to very true (7)                                                                                          |
| Extraversion                |                                                            | "I am enthusiastic, able to engage others."                |                                                                                                                          |
| Neuroticism                 |                                                            | "I easily become depressed, downcast."                     |                                                                                                                          |
| Openness                    |                                                            | "I have wide interests."                                   |                                                                                                                          |
| Agreeableness               |                                                            | "I trust others easily, have faith in the good of people." |                                                                                                                          |
| Conscientiousness           |                                                            | "I make plans and carry them out."                         |                                                                                                                          |
