# Supplementary material for: Validation of a German Version of Kelley’s (1992) Followership Questionnaire
Source: Atypon-hosted journal article supplement (doi:10.1027/2698-1866/a000005), 2021-01-19
Supplement: 2698-1866_a000005_esm7.pdf [file 2698-1866_a000005_esm7.pdf]

## Validation of a German Version of Kelley's (1992) Followership Questionnaire.

### ESM 7. Ant Colony Optimization.

Since some of the models we used in Study 2 had problematic model fit, we used the method of Ant Colony Optimization (ACO; Oлару et al., 2019) to identify sets of items that fit the model and thus improve construct validity. ACO was computed with the STUART package in R (Schultze, 2020), which refers to the classical Max-Min Ant-System (Stützle & Hoos, 2000). With the optimization we tried to minimize RMSEA while maximizing the reliability. The models were adjusted as follows:

#### *Model fit of personal initiative*

| Model         | $\chi^2$ (df)      | $\chi^2$ /df | CFI  | RMSEA<br>(90 CI)    | WRMR  |
|---------------|--------------------|--------------|------|---------------------|-------|
| Initial model | 132.826***<br>(14) | 8.845        | .966 | .149<br>(.127-.173) | 1.055 |
| Final model   | 11.322*<br>(5)     | 2.264        | .997 | .058<br>(.008-.103) | .364  |

Notes.  $N = 413$ . Final model: 5 of initial 7 items.

\*  $p < .05$ . \*\*\*  $p < .001$ .

#### *Model fit of self-responsibility*

| Model         | $\chi^2$ (df)        | $\chi^2$ /df | CFI  | RMSEA<br>(90 CI)    | WRMR  |
|---------------|----------------------|--------------|------|---------------------|-------|
| Initial model | 1415.408***<br>(170) | 8.326        | .608 | .135<br>(.129-.142) | 2.248 |
| Final model   | 111.895***<br>(27)   | 4.144        | .950 | .088<br>(.072-.106) | .919  |

Notes.  $N = 413$ . Final model: 9 of initial 20 items.

\*\*\*  $p < .001$ .

*Model fit of SITs*

| Model         | $\chi^2$ (df)      | $\chi^2$ /df | CFI  | RMSEA<br>(90 CI)    | WRMR  |
|---------------|--------------------|--------------|------|---------------------|-------|
| Initial model | 359.377***<br>(98) | 3.667        | .928 | .081<br>(.072-.090) | 1.222 |
| Final model   | 303.157***<br>(84) | 3.609        | .934 | .080<br>(.070-.090) | 1.164 |

Notes.  $N = 413$ . Final model: All items of pressure, flattering, engaging superior authority and 3 of initial 4 items of rational influence.

\*\*\*  $p < .001$ .

*Model fit of LMX*

| Model         | $\chi^2$ (df)     | $\chi^2$ /df | CFI  | RMSEA<br>(90 CI)    | WRMR |
|---------------|-------------------|--------------|------|---------------------|------|
| Initial model | 79.401***<br>(14) | 5.672        | .992 | .108<br>(.086-.132) | .715 |
| Final model   | 21.567*<br>(9)    | 2.396        | .998 | .059<br>(.027-.092) | .395 |

Notes.  $N = 413$ . Final model: 6 of initial 7 items.

\*  $p < .05$ . \*\*\*  $p < .001$ .

*Model fit of job satisfaction*

| Model         | $\chi^2$ (df)     | $\chi^2$ /df | CFI   | RMSEA<br>(90 CI)    | WRMR |
|---------------|-------------------|--------------|-------|---------------------|------|
| Initial model | 97.887***<br>(14) | 6.992        | .978  | .122<br>(.100-.146) | .862 |
| Final model   | 5.711<br>(5)      | 1.142        | 1.000 | .019<br>(.000-.074) | .258 |

Notes.  $N = 413$ . Final model: 5 of initial 7 items.

\*\*\*  $p < .001$ .

*Model fit of organizational commitment*

| Model         | $\chi^2$ (df)      | $\chi^2$ /df | CFI  | RMSEA<br>(90 CI)    | WRMR  |
|---------------|--------------------|--------------|------|---------------------|-------|
| Initial model | 595.275***<br>(90) | 6.614        | .946 | .118<br>(.110-.128) | 1.318 |
| Final model   | 91.423***<br>(27)  | 3.386        | .988 | .077<br>(.060-.095) | .645  |

Notes.  $N = 413$ . Final model: 9 of initial 15 items.

\*\*\*  $p < .001$ .

*Model fit of OCBs*

| Model         | $\chi^2$ (df)     | $\chi^2$ /df | CFI  | RMSEA<br>(90 CI)    | WRMR |
|---------------|-------------------|--------------|------|---------------------|------|
| Initial model | 98.119***<br>(34) | 2.886        | .965 | .069<br>(.053-.085) | .790 |

Notes.  $N = 413$ . No adjustments.

\*\*\*  $p < .001$ .

*Model fit of emotional exhaustion*

| Model         | $\chi^2$ (df)      | $\chi^2$ /df | CFI  | RMSEA<br>(90 CI)    | WRMR  |
|---------------|--------------------|--------------|------|---------------------|-------|
| Initial model | 224.949***<br>(27) | 8.331        | .965 | .138<br>(.121-.155) | 1.236 |
| Final model   | 21.993**<br>(9)    | 2.444        | .994 | .061<br>(.029-.094) | .488  |

Notes.  $N = 413$ . Final model: 6 of initial 9 items.

\*\*  $p < .01$ . \*\*\*  $p < .001$ .

*Model fit of Big Five personality traits*

| Model         | $\chi^2$ (df)        | $\chi^2$ /df | CFI  | RMSEA<br>(90 CI)    | WRMR  |
|---------------|----------------------|--------------|------|---------------------|-------|
| Initial model | 1158.715***<br>(179) | 6.473        | .847 | .116<br>(.110-.122) | 1.945 |
| Final model   | 575.584***<br>(125)  | 4.605        | .920 | .094<br>(.086-.102) | 1.467 |

*Notes.*  $N = 413$ . Final model: All items of agreeableness and conscientiousness, 4 of initial 5 items of extraversion and openness, 3 of initial 4 items of neuroticism.

\*\*\*  $p < .001$ .

**References:**

- Olaru, G., Schroeders, U., Hartung, J., & Wilhelm, O. (2019). Ant Colony Optimization and local weighted structural equation modeling. A tutorial on novel item and person sampling procedures for personality research. *European Journal of Personality, 33*(3), 400–419. <https://doi.org/10.1002/per.2195>.
- Schultze, M. (2020). *STUART* (R package version 0.9.0) [Computer software]. <https://CRAN.R-project.org/package=stuart>
- Stützle, T. & Hoos, H. H. (2000). MAX-MIN ant system. *Future Generation Computer Systems, 16*(8), 889–914. [https://doi.org/10.1016/S0167-739X\(00\)00043-1](https://doi.org/10.1016/S0167-739X(00)00043-1)
